# Supplementary material for: Detecting Presymptomatic Infection Is Necessary to Forecast Major Epidemics in the Earliest Stages of Infectious Disease Outbreaks
Source: PubMed Central journal article supplement (PMC4821482; doi:10.1371/journal.pcbi.1004836), 2016-04-05

**S1 Fig. Possible outbreak sizes for different values of  $R_0$  in the stochastic SEIR model.** Probability distributions for the total number of individuals ever infected for various values of  $R_0$ , obtained from 100,000 simulated outbreaks per  $R_0$  value (starting with one presymptomatic infected individual and all other individuals in the population of size 1,000 susceptible). Other parameter values:  $1/\gamma = 3.35$  days and  $1/\mu = 3.5$  days.

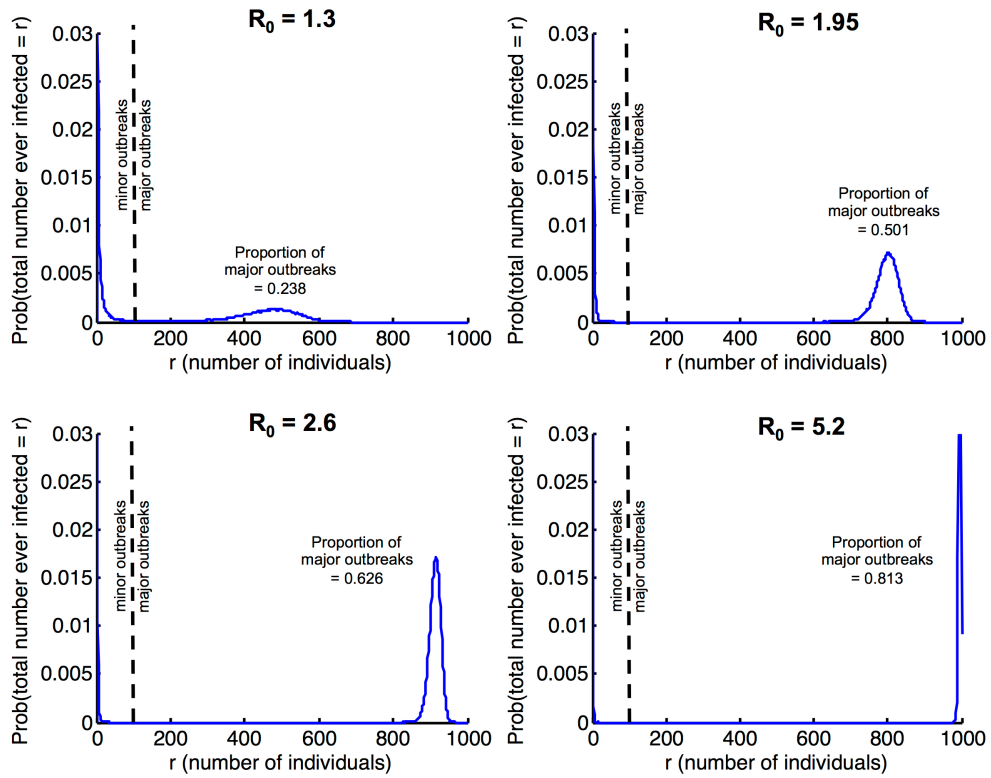

Supplement: pcbi.1004836.s001.pdf [file pcbi.1004836.s001.pdf]
