# Supplementary material for: Detecting Presymptomatic Infection Is Necessary to Forecast Major Epidemics in the Earliest Stages of Infectious Disease Outbreaks
Source: PubMed Central journal article supplement (PMC4821482; doi:10.1371/journal.pcbi.1004836), 2016-04-05

**S3 Fig. Robustness of results to different numbers of deaths at the time of estimation.** For clarity, true probabilities greater than 0.97 are classified into bins of size 0.01.

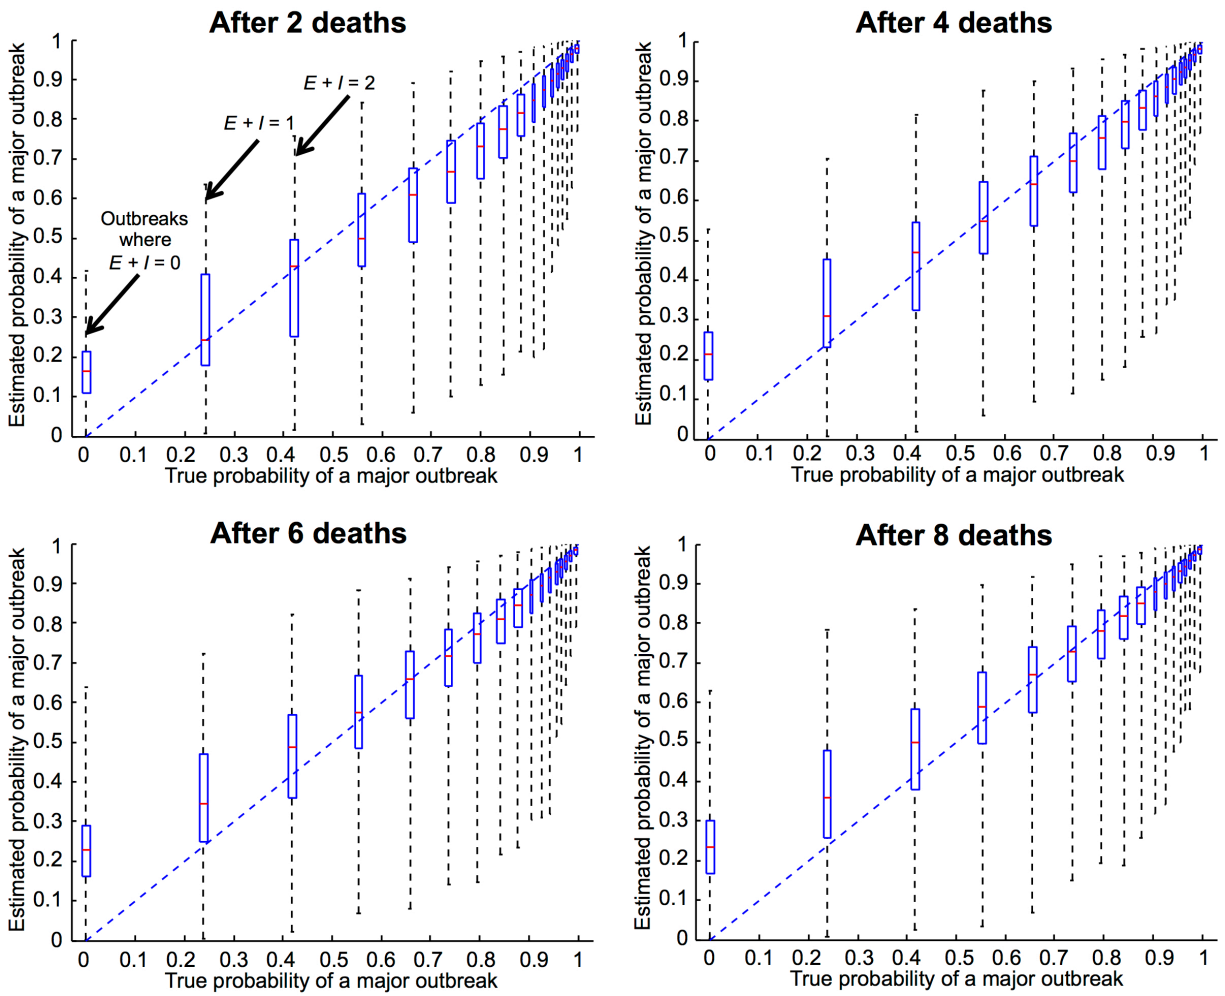

Supplement: pcbi.1004836.s003.pdf [file pcbi.1004836.s003.pdf]
