# Supplementary material for: Detecting Presymptomatic Infection Is Necessary to Forecast Major Epidemics in the Earliest Stages of Infectious Disease Outbreaks
Source: PubMed Central journal article supplement (PMC4821482; doi:10.1371/journal.pcbi.1004836), 2016-04-05

**S6 Fig. Robustness of results to different values of the basic reproductive number.**  $R_0$  is varied by changing the infection rate,  $\beta$ , between subfigures. For  $R_0 = 1.2$ , true probabilities greater than 0.97 are classified into bins of size 0.01. For  $R_0 = 1.6$ , true probabilities greater than 0.98 are classified into bins of size 0.01. For  $R_0 = 2$  and  $R_0 = 4$ , true probabilities greater than 0.99 are classified into a bin of size 0.01.

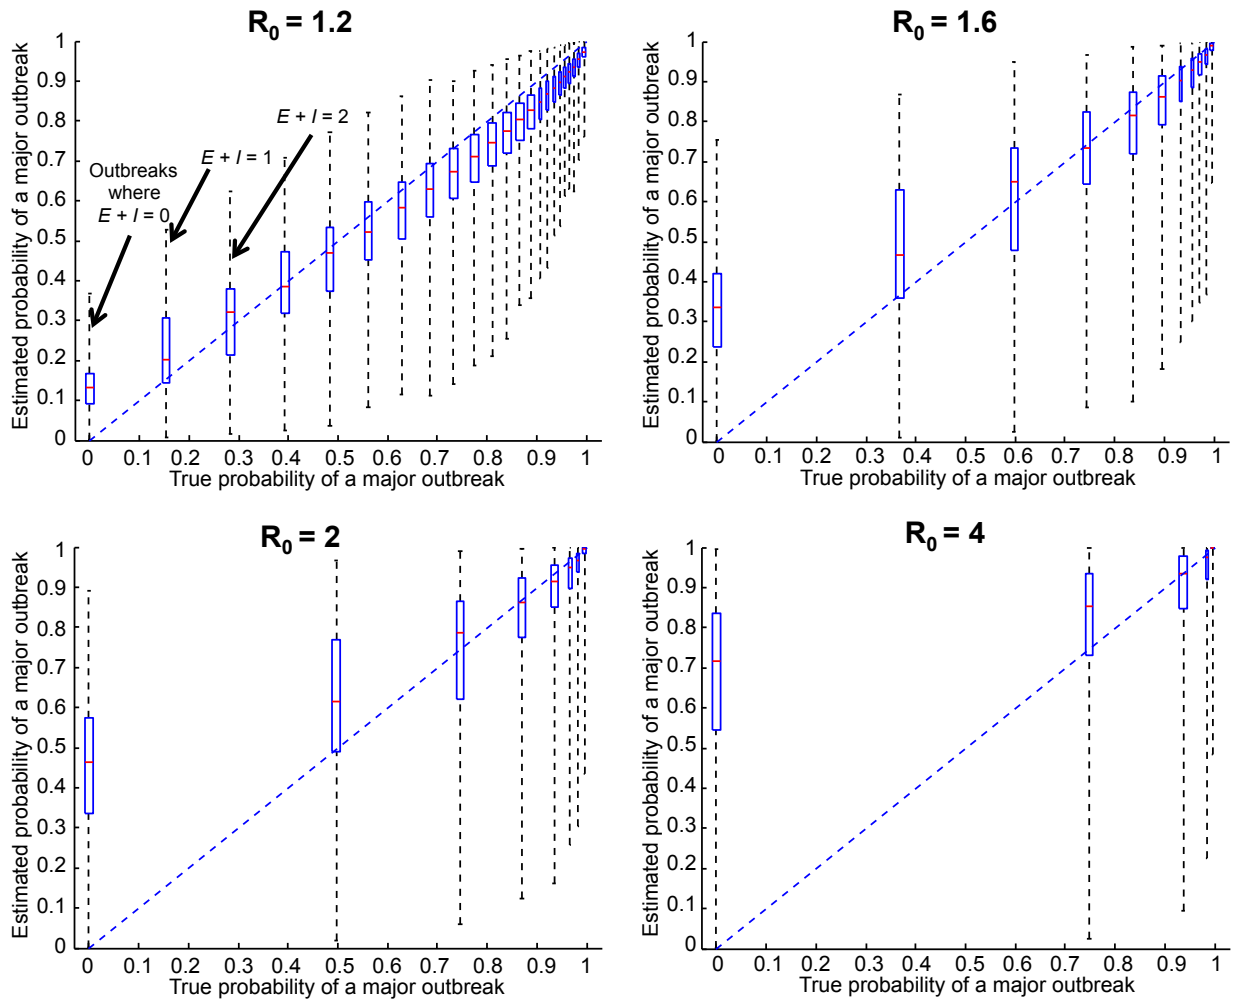

Supplement: pcbi.1004836.s006.pdf [file pcbi.1004836.s006.pdf]
