# Supplementary material for: Detecting Presymptomatic Infection Is Necessary to Forecast Major Epidemics in the Earliest Stages of Infectious Disease Outbreaks
Source: PubMed Central journal article supplement (PMC4821482; doi:10.1371/journal.pcbi.1004836), 2016-04-05

**S7 Fig. Error in the probability of a major outbreak when the infection rate is estimated.** If the probability of a major outbreak is estimated with  $\beta$  unknown but the number of presymptomatic infected individuals at the time of estimation known, then there can be less error than due to presymptomatic infection alone. Here,  $\beta$  is estimated via maximum likelihood estimation, and constrained to within  $x\%$  of the true value (representing prior knowledge about the value of  $\beta$ ). Constructed from 10,000 outbreaks simulated until four deaths have occurred using the SEIR model.

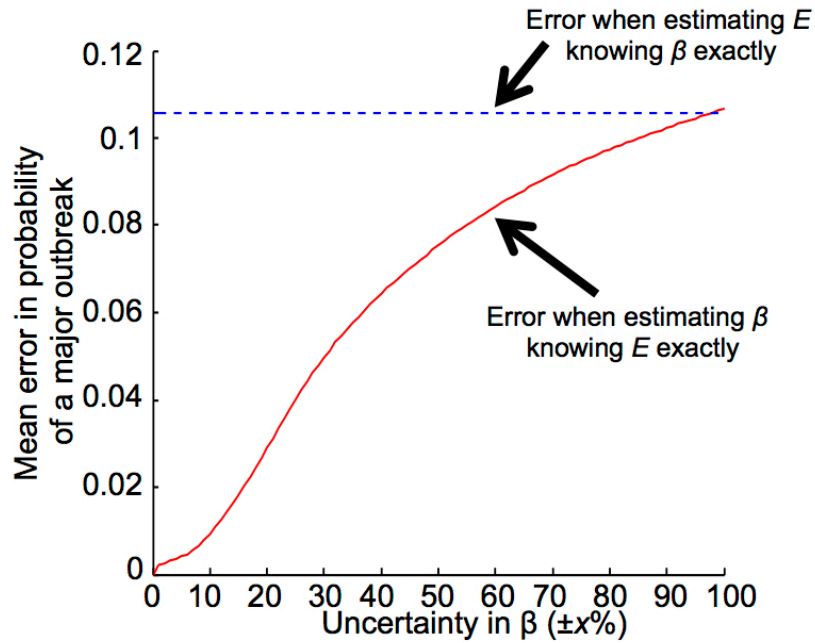

Supplement: pcbi.1004836.s007.pdf [file pcbi.1004836.s007.pdf]
