# Supplementary material for: Detecting Presymptomatic Infection Is Necessary to Forecast Major Epidemics in the Earliest Stages of Infectious Disease Outbreaks
Source: PubMed Central journal article supplement (PMC4821482; doi:10.1371/journal.pcbi.1004836), 2016-04-05

**S10 Fig. Using a single simulated dataset to compare the exact probability distribution for the current epidemic size given idealized data, as used in our paper, with approximations of this distribution obtained using back-calculation (see Text S4). A. The dataset used for estimating  $E$  (the true value of  $E$  at the time of estimation is 2). B. Estimation of  $E$  using simple back-calculation. As can be seen, simple back-calculation does not discriminate well between different small values of  $E$ , which is important in estimating the probability of a major outbreak when the first few symptomatic cases occur. C. Estimation of  $E$  using extended back-calculation (with the full  $I(t)$  curve observed, and population size and transmission parameters known). Extended back-calculation captures the exact distribution used in our manuscript.**

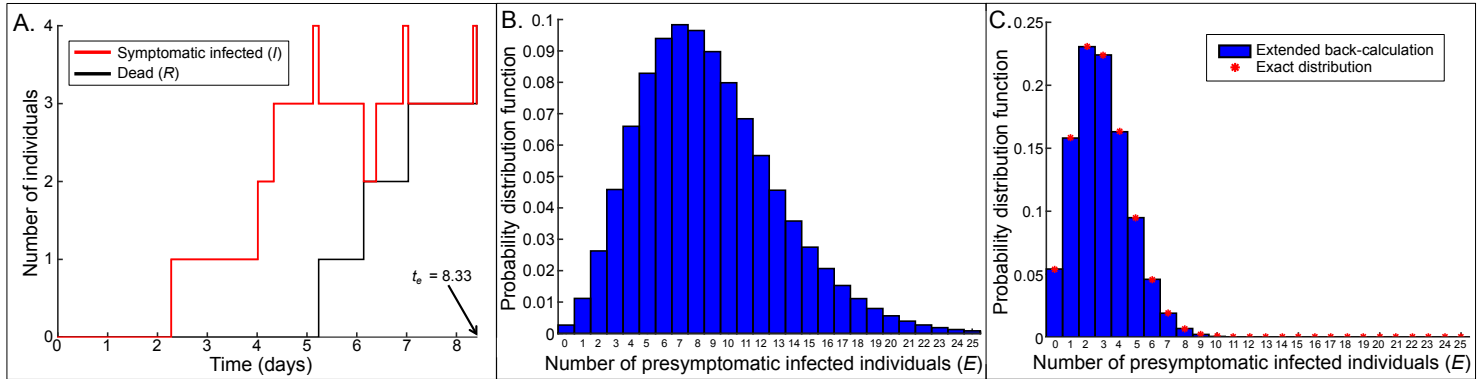

Supplement: pcbi.1004836.s010.pdf [file pcbi.1004836.s010.pdf]
